# Supplementary material for: Transition metal doping: a new and effective approach for remarkably high nonlinear optical response in aluminum nitride nanocages
Source: Royal Society of Chemistry journal article supplement (doi:10.1039/c7nj04971d), 2018-01-01
Supplement: c7nj04971d1.pdf [file c7nj04971d1.pdf]

## **New Journal of Chemistry**

### **Supporting Information**

#### **Transition metal doping: a new and effective approach for remarkably high nonlinear optical response in aluminum nitride nanocages**

Yasir Arshad,<sup>a</sup> Saima Khan,<sup>a</sup> Muhammad Ali Hashmi,<sup>b</sup> Khurshid Ayub<sup>a</sup>

<sup>a</sup>Department of Chemistry, COMSATS Institute of Information Technology, Abbottabad 22060

<sup>b</sup>School of Chemical and Physical Sciences, Victoria University of Wellington, Wellington, New Zealand

Table 1. Zero point corrected Energies (in au) of doped  $M@x\text{-Al}_{12}\text{N}_{12}$  ( $x = b_{64}, b_{66}, r_6$  and  $r_4$ ,  $M=\text{Sc, Ti, V, Cr, Mn, Fe, Co, Ni, Cu, Zn}$ ) in four different spin states

| Metals | Spin State | ZP ENERGIES                            |                                        |                                     |                                     |
|--------|------------|----------------------------------------|----------------------------------------|-------------------------------------|-------------------------------------|
|        |            | $M@b_{64}\text{-Al}_{12}\text{N}_{12}$ | $M@b_{66}\text{-Al}_{12}\text{N}_{12}$ | $M@r_6\text{-Al}_{12}\text{N}_{12}$ | $M@r_4\text{-Al}_{12}\text{N}_{12}$ |
| Sc     | Doublet    | -4327.828166                           | -4327.825633                           | -4327.87308                         | -4327.825465                        |
|        | Quartet    | -4327.790376                           | -4327.790378                           | -4327.817943                        | -4327.786508                        |
|        | Sextet     | -4327.694309                           | -4327.693848                           | -4327.720338                        | -4327.694319                        |
|        | Octet      | -4327.610298                           | -4327.610298                           | -4327.586442                        | -4327.596639                        |
| Ti     | Singlet    | -4416.530288                           | -4416.517895                           | -4416.55362                         | -4416.530219                        |
|        | Triplet    | -4416.5445                             | -4416.53942                            | -4416.580876                        | -4416.544503                        |
|        | Quintet    | -4416.505486                           | -4416.503232                           | -4416.495367                        | -4416.504887                        |
|        | Septet     | -4416.411204                           | -4416.4069                             | -4416.392571                        | -4416.411201                        |
| V      | Doublet    | -4511.043127                           | -4511.039426                           | -4511.019301                        | -4511.043128                        |
|        | Quartet    | -4511.066585                           | -4511.064296                           | -4511.066585                        | -4511.066585                        |
|        | Sextet     | -4511.026211                           | -4511.026314                           | -4511.02386                         | -4511.03786                         |
|        | Octet      | -4510.940626                           | -4510.937692                           | -4510.923025                        | -4510.940627                        |
| Cr     | Singlet    | -4611.441639                           | -4611.434413                           | -4611.435414                        | -4611.441399                        |
|        | Triplet    | -4611.500525                           | -4611.500615                           | -4611.514901                        | -4611.500528                        |
|        | Quintet    | -4611.547616                           | -4611.548152                           | -4611.547614                        | -4611.547615                        |
|        | Septet     | -4611.515073                           | -4611.514274                           | -4611.506221                        | -4611.515089                        |
| Mn     | Doublet    | -4717.985329                           | -4717.98805                            | -4717.988189                        | -4717.960025                        |
|        | Quartet    | -4718.035339                           | -4718.015734                           | -4718.035356                        | -4718.03638                         |
|        | Sextet     | -4718.072525                           | -4718.071932                           | -4718.038666                        | -4718.072521                        |
|        | Octet      | -4718.029509                           | -4718.028365                           | -4718.003022                        | -4718.029509                        |
| Fe     | Singlet    | -4830.647535                           | -4830.64858                            | -4830.647539                        | -4830.653482                        |
|        | Triplet    | -4830.717943                           | -4830.716837                           | -4830.685732                        | -4830.714816                        |
|        | Quintet    | -4830.747612                           | -4830.743752                           | -4830.746582                        | -4830.74761                         |
|        | Septet     | -4830.688123                           | -4830.686591                           | -4830.659588                        | -4830.688121                        |
| Co     | Doublet    | -4949.759109                           | -4949.757997                           | -4949.759107                        | -4949.759117                        |
|        | Quartet    | -4949.775685                           | -4949.77508                            | -4949.725524                        | -4949.775683                        |
|        | Sextet     | -4949.714472                           | -4949.713319                           | -4949.68523                         | -4949.714462                        |
|        | Octet      | -4949.622049                           | -4949.622773                           | -4949.669097                        | -4949.622771                        |
| Ni     | Singlet    | -5075.280392                           | -5075.280243                           | -5075.238876                        | -5075.274877                        |
|        | Triplet    | -5075.28653                            | -5075.286006                           | -5075.286524                        | -5075.286533                        |
|        | Quintet    | -5075.21506                            | -5075.213318                           | -5075.190153                        | -5075.204346                        |
|        | Septet     | -5075.122499                           | -5075.122845                           | -5075.121742                        | -5075.122495                        |
| Cu     | Doublet    | -5207.439957                           | -5207.438586                           | -5207.409821                        | -5207.439961                        |
|        | Quartet    | -5207.340936                           | -5207.336151                           | -5207.361787                        | -5207.338199                        |
|        | Sextet     | -5207.247895                           | -5207.242825                           | -5207.279274                        | -5207.242535                        |
|        | Octet      | -5207.158908                           | -5207.148345                           | -5207.16246                         | -5207.145215                        |
| Zn     | Singlet    | -5346.283532                           | -5346.280842                           | -5346.269478                        | -5346.283537                        |
|        | Triplet    | -5346.236287                           | -5346.236209                           | -5346.1999                          | -5346.236286                        |
|        | Quintet    | -5346.14431                            | -5346.143788                           | -5346.117674                        | -5346.144314                        |
|        | Septet     | -5346.055417                           | -5346.047454                           | -5346.032952                        | -5346.047711                        |

**Table 2.** Total electronic energies (in au) of doped  $M@x\text{-Al}_{12}\text{N}_{12}$  ( $x = b_{64}, b_{66}, r_6$  and  $r_4$ ,  $M = \text{Sc, Ti, V, Cr, Mn, Fe, Co, Ni, Cu, Zn}$ ) in four different spin states

| Metals | Spin State | SCF ENERGIES                           |                                        |                                     |                                     |
|--------|------------|----------------------------------------|----------------------------------------|-------------------------------------|-------------------------------------|
|        |            | $M@b_{64}\text{-Al}_{12}\text{N}_{12}$ | $M@b_{66}\text{-Al}_{12}\text{N}_{12}$ | $M@r_6\text{-Al}_{12}\text{N}_{12}$ | $M@r_4\text{-Al}_{12}\text{N}_{12}$ |
| Sc     | Doublet    | -4327.906305                           | -4327.903912                           | -4327.95064                         | -4327.903476                        |
|        | Quartet    | -4327.8686                             | -4327.8686                             | -4327.894479                        | -4327.864743                        |
|        | Sextet     | -4327.770091                           | -4327.768887                           | -4327.794566                        | -4327.770099                        |
|        | Octet      | -4327.685196                           | -4327.685196                           | -4327.65906                         | -4327.670548                        |
| Ti     | Singlet    | -4416.60826                            | -4416.596038                           | -4416.631239                        | -4416.608114                        |
|        | Triplet    | -4416.622788                           | -4416.61777                            | -4416.658496                        | -4416.622788                        |
|        | Quintet    | -4416.583643                           | -4416.581543                           | -4416.572304                        | -4416.583328                        |
|        | Septet     | -4416.487211                           | -4416.480903                           | -4416.467135                        | -4416.487212                        |
| V      | Doublet    | -4511.121493                           | -4511.117846                           | -4511.095903                        | -4511.121493                        |
|        | Quartet    | -4511.144948                           | -4511.142781                           | -4511.144947                        | -4511.144948                        |
|        | Sextet     | -4511.104901                           | -4511.105004                           | -4511.101391                        | -4511.116506                        |
|        | Octet      | -4511.016988                           | -4511.013817                           | -4510.998161                        | -4511.01699                         |
| Cr     | Singlet    | -4611.519923                           | -4611.512727                           | -4611.512923                        | -4611.519305                        |
|        | Triplet    | -4611.579145                           | -4611.579397                           | -4611.592517                        | -4611.579145                        |
|        | Quintet    | -4611.626232                           | -4611.626877                           | -4611.626229                        | -4611.626232                        |
|        | Septet     | -4611.593747                           | -4611.59305                            | -4611.583553                        | -4611.593763                        |
| Mn     | Doublet    | -4718.06418                            | -4718.066965                           | -4718.067023                        | -4718.037953                        |
|        | Quartet    | -4718.113716                           | -4718.094366                           | -4718.113718                        | -4718.114804                        |
|        | Sextet     | -4718.151217                           | -4718.150634                           | -4718.117234                        | -4718.151217                        |
|        | Octet      | -4718.107701                           | -4718.106666                           | -4718.078187                        | -4718.107704                        |
| Fe     | Singlet    | -4830.72645                            | -4830.727666                           | -4830.72645                         | -4830.731748                        |
|        | Triplet    | -4830.796704                           | -4830.79572                            | -4830.762145                        | -4830.793547                        |
|        | Quintet    | -4830.826507                           | -4830.822672                           | -4830.825494                        | -4830.826507                        |
|        | Septet     | -4830.766262                           | -4830.764709                           | -4830.734362                        | -4830.766263                        |
| Co     | Doublet    | -4949.838119                           | -4949.837338                           | -4949.838115                        | -4949.838119                        |
|        | Quartet    | -4949.854727                           | -4949.854075                           | -4949.804168                        | -4949.854726                        |
|        | Sextet     | -4949.792575                           | -4949.791626                           | -4949.760292                        | -4949.792574                        |
|        | Octet      | -4949.698034                           | -4949.698542                           | -4949.745374                        | -4949.698541                        |
| Ni     | Singlet    | -5075.359593                           | -5075.359728                           | -5075.316657                        | -5075.354146                        |
|        | Triplet    | -5075.365631                           | -5075.365169                           | -5075.365628                        | -5075.365633                        |
|        | Quintet    | -5075.293352                           | -5075.291592                           | -5075.265354                        | -5075.282438                        |
|        | Septet     | -5075.198552                           | -5075.198868                           | -5075.196268                        | -5075.19855                         |
| Cu     | Doublet    | -5207.519273                           | -5207.517842                           | -5207.486793                        | -5207.519273                        |
|        | Quartet    | -5207.418929                           | -5207.414223                           | -5207.439032                        | -5207.415683                        |
|        | Sextet     | -5207.323813                           | -5207.316806                           | -5207.354316                        | -5207.317456                        |
|        | Octet      | -5207.232893                           | -5207.222289                           | -5207.236701                        | -5207.217425                        |
| Zn     | Singlet    | -5346.362432                           | -5346.359599                           | -5346.348328                        | -5346.362443                        |
|        | Triplet    | -5346.314559                           | -5346.314667                           | -5346.274943                        | -5346.31456                         |
|        | Quintet    | -5346.220507                           | -5346.218033                           | -5346.193206                        | -5346.220518                        |
|        | Septet     | -5346.129814                           | -5346.121812                           | -5346.106803                        | -5346.121984                        |

**Table 3.** Gibbs Energies (in au) of doped  $M@x\text{-Al}_{12}\text{N}_{12}$  ( $x = b_{64}, b_{66}, r_6$  and  $r_4$ ,  $M = \text{Sc, Ti, V, Cr, Mn, Fe, Co, Ni, Cu, Zn}$ ) in four different spin states

| Metals | Spin State | GIBBS ENERGIES                         |                                        |                                     |                                     |
|--------|------------|----------------------------------------|----------------------------------------|-------------------------------------|-------------------------------------|
|        |            | $M@b_{64}\text{-Al}_{12}\text{N}_{12}$ | $M@b_{66}\text{-Al}_{12}\text{N}_{12}$ | $M@r_6\text{-Al}_{12}\text{N}_{12}$ | $M@r_4\text{-Al}_{12}\text{N}_{12}$ |
| Sc     | Doublet    | -4327.877504                           | -4327.874569                           | -4327.922426                        | -4327.873262                        |
|        | Quartet    | -4327.839782                           | -4327.839783                           | -4327.867766                        | -4327.835895                        |
|        | Sextet     | -4327.746005                           | -4327.745453                           | -4327.77149                         | -4327.746075                        |
|        | Octet      | -4327.662167                           | -4327.662166                           | -4327.638936                        | -4327.648356                        |
| Ti     | Singlet    | -4416.579272                           | -4416.565075                           | -4416.602117                        | -4416.579136                        |
|        | Triplet    | -4416.593981                           | -4416.589074                           | -4416.630419                        | -4416.593984                        |
|        | Quintet    | -4416.555288                           | -4416.5539                             | -4416.545374                        | -4416.554524                        |
|        | Septet     | -4416.463048                           | -4416.458608                           | -4416.444122                        | -4416.463048                        |
| V      | Doublet    | -4511.092176                           | -4511.08831                            | -4511.068816                        | -4511.092178                        |
|        | Quartet    | -4511.116302                           | -4511.113711                           | -4511.1163                          | -4511.116302                        |
|        | Sextet     | -4511.076352                           | -4511.076539                           | -4511.073021                        | -4511.08763                         |
|        | Octet      | -4510.99233                            | -4510.989187                           | -4510.973617                        | -4510.99233                         |
| Cr     | Singlet    | -4611.490663                           | -4611.48312                            | -4611.483172                        | -4611.488624                        |
|        | Triplet    | -4611.549869                           | -4611.549562                           | -4611.56382                         | -4611.549877                        |
|        | Quintet    | -4611.597326                           | -4611.597648                           | -4611.597329                        | -4611.597325                        |
|        | Septet     | -4611.565442                           | -4611.564443                           | -4611.557125                        | -4611.565448                        |
| Mn     | Doublet    | -4718.033969                           | -4718.03656                            | -4718.036863                        | -4718.008421                        |
|        | Quartet    | -4718.085753                           | -4718.065074                           | -4718.085804                        | -4718.085674                        |
|        | Sextet     | -4718.122328                           | -4718.121797                           | -4718.090694                        | -4718.122321                        |
|        | Octet      | -4718.08027                            | -4718.079003                           | -4718.056122                        | -4718.080267                        |
| Fe     | Singlet    | -4830.695615                           | -4830.696255                           | -4830.695621                        | -4830.701023                        |
|        | Triplet    | -4830.767419                           | -4830.765851                           | -4830.733592                        | -4830.762711                        |
|        | Quintet    | -4830.79712                            | -4830.793162                           | -4830.796062                        | -4830.797113                        |
|        | Septet     | -4830.739084                           | -4830.737454                           | -4830.71033                         | -4830.739075                        |
| Co     | Doublet    | -4949.807796                           | -4949.806242                           | -4949.807784                        | -4949.807816                        |
|        | Quartet    | -4949.824828                           | -4949.82434                            | -4949.776355                        | -4949.824815                        |
|        | Sextet     | -4949.765282                           | -4949.763822                           | -4949.737328                        | -4949.765255                        |
|        | Octet      | -4949.673941                           | -4949.674518                           | -4949.720242                        | -4949.674517                        |
| Ni     | Singlet    | -5075.328587                           | -5075.32772                            | -5075.287271                        | -5075.323375                        |
|        | Triplet    | -5075.335361                           | -5075.334766                           | -5075.335354                        | -5075.335359                        |
|        | Quintet    | -5075.26539                            | -5075.263557                           | -5075.241264                        | -5075.255211                        |
|        | Septet     | -5075.17402                            | -5075.17407                            | -5075.172647                        | -5075.174013                        |
| Cu     | Doublet    | -5207.488292                           | -5207.486975                           | -5207.459145                        | -5207.488295                        |
|        | Quartet    | -5207.391885                           | -5207.386443                           | -5207.411702                        | -5207.388003                        |
|        | Sextet     | -5207.299508                           | -5207.295849                           | -5207.331439                        | -5207.293959                        |
|        | Octet      | -5207.21233                            | -5207.201107                           | -5207.213749                        | -5207.197947                        |
| Zn     | Singlet    | -5346.331807                           | -5346.329445                           | -5346.32                            | -5346.331808                        |
|        | Triplet    | -5346.286305                           | -5346.285897                           | -5346.250979                        | -5346.286303                        |
|        | Quintet    | -5346.195587                           | -5346.195033                           | -5346.169639                        | -5346.195585                        |
|        | Septet     | -5346.107528                           | -5346.099564                           | -5346.085014                        | -5346.099993                        |

**Table 4.** Zero point corrected Binding Energies (in au) of doped  $M@x\text{-Al}_{12}\text{N}_{12}$  ( $x = b_{64}, b_{66}, r_6$  and  $r_4$ ,  $M=\text{Sc, Ti, V, Cr, Mn, Fe, Co, Ni, Cu, Zn}$ ) in four different spin states

| Metals | Spin State | ZP BINDING ENERGY                      |                                        |                                     |                                     |
|--------|------------|----------------------------------------|----------------------------------------|-------------------------------------|-------------------------------------|
|        |            | $M@b_{64}\text{-Al}_{12}\text{N}_{12}$ | $M@b_{66}\text{-Al}_{12}\text{N}_{12}$ | $M@r_6\text{-Al}_{12}\text{N}_{12}$ | $M@r_4\text{-Al}_{12}\text{N}_{12}$ |
| Sc     | Doublet    | -53.23                                 | -51.64                                 | -81.41                              | -51.5                               |
|        | Quartet    | -29.51                                 | -29.51                                 | -46.81                              | -27.1                               |
|        | Sextet     | 30.77                                  | 31.06                                  | 14.44                               | 30.76                               |
|        | Octet      | 83.49                                  | 83.489                                 | 98.46                               | 92.06                               |
| Ti     | Singlet    | -41.53                                 | -33.75                                 | -56.17                              | -41.5                               |
|        | Triplet    | -50.44                                 | -47.26                                 | -73.27                              | -50.4                               |
|        | Quintet    | -25.96                                 | -24.55                                 | -19.61                              | -25.6                               |
|        | Septet     | 33.2                                   | 35.9                                   | 44.89                               | 33.2                                |
| V      | Doublet    | -41.32                                 | -39                                    | -26.37                              | -41.3                               |
|        | Quartet    | -56.04                                 | -54.6                                  | -56.04                              | -56                                 |
|        | Sextet     | -30.7                                  | -30.77                                 | -29.23                              | -38                                 |
|        | Octet      | 23                                     | 24.844                                 | 34.05                               | 23                                  |
| Cr     | Singlet    | 8.06                                   | 12.594                                 | 11.97                               | 8.21                                |
|        | Triplet    | -28.89                                 | -28.95                                 | -37.91                              | -28.9                               |
|        | Quintet    | -58.44                                 | -58.78                                 | -58.44                              | -58.4                               |
|        | Septet     | -38.02                                 | -37.52                                 | -32.47                              | -38                                 |
| Mn     | Doublet    | 28.9                                   | 27.195                                 | 27.11                               | 44.78                               |
|        | Quartet    | -2.479                                 | 9.823                                  | -2.49                               | -3.13                               |
|        | Sextet     | -25.81                                 | -25.44                                 | -4.567                              | -25.8                               |
|        | Octet      | 1.179                                  | 1.897                                  | 17.8                                | 1.179                               |
| Fe     | Singlet    | 23.2                                   | 22.546                                 | 23.2                                | 19.47                               |
|        | Triplet    | -20.98                                 | -20.29                                 | -0.767                              | -19                                 |
|        | Quintet    | -39.6                                  | -37.18                                 | -38.95                              | -39.6                               |
|        | Septet     | -2.268                                 | -1.306                                 | 15.64                               | -2.27                               |
| Co     | Doublet    | -83.91                                 | -83.22                                 | -37.37                              | -83.9                               |
|        | Quartet    | -94.32                                 | -93.94                                 | -16.3                               | -94.3                               |
|        | Sextet     | -55.9                                  | -55.18                                 | 8.986                               | -55.9                               |
|        | Octet      | 2.092                                  | 1.6378                                 | 19.11                               | 1.639                               |
| Ni     | Singlet    | -49.09                                 | -48.99                                 | -23.04                              | -45.6                               |
|        | Triplet    | -52.94                                 | -52.61                                 | -52.93                              | -52.9                               |
|        | Quintet    | -8.09                                  | -6.997                                 | 7.539                               | -1.37                               |
|        | Septet     | 49.99                                  | 49.775                                 | 50.47                               | 49.99                               |
| Cu     | Doublet    | -63.9                                  | -63.04                                 | -44.99                              | -63.9                               |
|        | Quartet    | -1.76                                  | 1.2425                                 | -14.84                              | -0.04                               |
|        | Sextet     | 56.62                                  | 59.805                                 | 36.93                               | 59.99                               |
|        | Octet      | 112.5                                  | 119.09                                 | 110.2                               | 121.1                               |
| Zn     | Singlet    | -17.91                                 | -16.22                                 | -9.091                              | -17.9                               |
|        | Triplet    | 11.74                                  | 11.786                                 | 34.57                               | 11.74                               |
|        | Quintet    | 69.45                                  | 69.781                                 | 86.17                               | 69.45                               |
|        | Septet     | 125.2                                  | 130.23                                 | 139.3                               | 130.1                               |

**Table 5.** SCF Binding Energies (in au) of doped  $M@x\text{-Al}_{12}\text{N}_{12}$  ( $x = b_{64}, b_{66}, r_6$  and  $r_4$ ,  $M = \text{Sc, Ti, V, Cr, Mn, Fe, Co, Ni, Cu, Zn}$ ) in four different spin states

| Metals | Spin State | SCF BINDING ENERGY                     |                                        |                                     |                                     |
|--------|------------|----------------------------------------|----------------------------------------|-------------------------------------|-------------------------------------|
|        |            | $M@b_{64}\text{-Al}_{12}\text{N}_{12}$ | $M@b_{66}\text{-Al}_{12}\text{N}_{12}$ | $M@r_6\text{-Al}_{12}\text{N}_{12}$ | $M@r_4\text{-Al}_{12}\text{N}_{12}$ |
| Sc     | Doublet    | -52.84                                 | -52.84                                 | -52.84                              | -52.84                              |
|        | Quartet    | -29.18                                 | -29.18                                 | -29.18                              | -29.18                              |
|        | Sextet     | 32.63                                  | 32.63                                  | 32.63                               | 32.63                               |
|        | Octet      | 85.91                                  | 85.91                                  | 85.91                               | 85.91                               |
| Ti     | Singlet    | -41.04                                 | -41.04                                 | -41.04                              | -41.04                              |
|        | Triplet    | -50.16                                 | -50.16                                 | -50.16                              | -50.16                              |
|        | Quintet    | -25.59                                 | -25.59                                 | -25.59                              | -25.59                              |
|        | Septet     | 34.92                                  | 34.92                                  | 34.92                               | 34.92                               |
| V      | Doublet    | -41.08                                 | -41.08                                 | -41.08                              | -41.08                              |
|        | Quartet    | -55.8                                  | -55.8                                  | -55.8                               | -55.8                               |
|        | Sextet     | -30.67                                 | -30.67                                 | -30.67                              | -30.67                              |
|        | Octet      | 24.5                                   | 24.5                                   | 24.5                                | 24.5                                |
| Cr     | Singlet    | 8.351                                  | 8.351                                  | 8.351                               | 8.351                               |
|        | Triplet    | -28.81                                 | -28.81                                 | -28.81                              | -28.81                              |
|        | Quintet    | -58.36                                 | -58.36                                 | -58.36                              | -58.36                              |
|        | Septet     | -37.97                                 | -37.97                                 | -37.97                              | -37.97                              |
| Mn     | Doublet    | 28.84                                  | 28.84                                  | 28.84                               | 28.84                               |
|        | Quartet    | -2.246                                 | -2.246                                 | -2.246                              | -2.246                              |
|        | Sextet     | -25.78                                 | -25.78                                 | -25.78                              | -25.78                              |
|        | Octet      | 1.528                                  | 1.528                                  | 1.528                               | 1.528                               |
| Fe     | Singlet    | 23.1                                   | 23.1                                   | 23.1                                | 23.1                                |
|        | Triplet    | -20.99                                 | -20.99                                 | -20.99                              | -20.99                              |
|        | Quintet    | -39.69                                 | -39.69                                 | -39.69                              | -39.69                              |
|        | Septet     | -1.886                                 | -1.886                                 | -1.886                              | -1.886                              |
| Co     | Doublet    | -84.08                                 | -84.08                                 | -37.54                              | -84.08                              |
|        | Quartet    | -94.5                                  | -94.5                                  | -16.23                              | -94.5                               |
|        | Sextet     | -55.5                                  | -55.5                                  | 11.3                                | -55.5                               |
|        | Octet      | 3.826                                  | 3.826                                  | 3.826                               | 3.826                               |
| Ni     | Singlet    | -49.37                                 | -49.37                                 | -49.37                              | -49.37                              |
|        | Triplet    | -53.16                                 | -53.16                                 | -53.16                              | -53.16                              |
|        | Quintet    | -7.804                                 | -7.804                                 | -7.804                              | -7.804                              |
|        | Septet     | 51.68                                  | 51.68                                  | 51.68                               | 51.68                               |
| Cu     | Doublet    | -64.25                                 | -64.25                                 | -64.25                              | -64.25                              |
|        | Quartet    | -1.286                                 | -1.286                                 | -1.286                              | -1.286                              |
|        | Sextet     | 58.4                                   | 58.4                                   | 58.4                                | 58.4                                |
|        | Octet      | 115.5                                  | 115.5                                  | 115.5                               | 115.5                               |
| Zn     | Singlet    | -18                                    | -18                                    | -18                                 | -18                                 |
|        | Triplet    | 12.04                                  | 12.04                                  | 12.04                               | 12.04                               |
|        | Quintet    | 71.05                                  | 71.05                                  | 71.05                               | 71.05                               |
|        | Septet     | 128                                    | 128                                    | 128                                 | 128                                 |

**Table 6.** Gibbs Binding Energies (in au) of doped  $M@x\text{-Al}_{12}\text{N}_{12}$  ( $x = b_{64}, b_{66}, r_6$  and  $r_4$ ,  $M = \text{Sc, Ti, V, Cr, Mn, Fe, Co, Ni, Cu, Zn}$ ) in four different spin states

| Metals | Spin State | GIBBS BINDING ENERGY                   |                                        |                                     |                                     |
|--------|------------|----------------------------------------|----------------------------------------|-------------------------------------|-------------------------------------|
|        |            | $M@b_{64}\text{-Al}_{12}\text{N}_{12}$ | $M@b_{66}\text{-Al}_{12}\text{N}_{12}$ | $M@r_6\text{-Al}_{12}\text{N}_{12}$ | $M@r_4\text{-Al}_{12}\text{N}_{12}$ |
| Sc     | Doublet    | -46.13                                 | -44.29                                 | -74.32                              | -43.47                              |
|        | Quartet    | -22.46                                 | -22.46                                 | -40.02                              | -20.02                              |
|        | Sextet     | 36.385                                 | 36.731                                 | 20.39                               | 36.34                               |
|        | Octet      | 88.994                                 | 88.995                                 | 103.6                               | 97.66                               |
| Ti     | Singlet    | -33.91                                 | -25                                    | -48.25                              | -33.83                              |
|        | Triplet    | -43.14                                 | -40.06                                 | -66.01                              | -43.15                              |
|        | Quintet    | -18.86                                 | -17.99                                 | -12.64                              | -18.38                              |
|        | Septet     | 39.018                                 | 41.804                                 | 50.89                               | 39.02                               |
| V      | Doublet    | -33.52                                 | -31.09                                 | -18.86                              | -33.52                              |
|        | Quartet    | -48.66                                 | -47.03                                 | -48.66                              | -48.66                              |
|        | Sextet     | -23.59                                 | -23.71                                 | -21.5                               | -30.67                              |
|        | Octet      | 29.133                                 | 31.106                                 | 40.88                               | 29.13                               |
| Cr     | Singlet    | 16.021                                 | 20.754                                 | 20.72                               | 17.3                                |
|        | Triplet    | -21.13                                 | -20.94                                 | -29.89                              | -21.14                              |
|        | Quintet    | -50.91                                 | -51.11                                 | -50.91                              | -50.91                              |
|        | Septet     | -30.9                                  | -30.28                                 | -25.68                              | -30.91                              |
| Mn     | Doublet    | 37.263                                 | 35.637                                 | 35.45                               | 53.29                               |
|        | Quartet    | 4.7678                                 | 17.744                                 | 4.736                               | 4.817                               |
|        | Sextet     | -18.18                                 | -17.85                                 | 1.667                               | -18.18                              |
|        | Octet      | 8.2085                                 | 9.0035                                 | 23.36                               | 8.21                                |
| Fe     | Singlet    | 31.822                                 | 31.42                                  | 31.82                               | 28.43                               |
|        | Triplet    | -13.24                                 | -12.25                                 | 7.991                               | -10.28                              |
|        | Quintet    | -31.87                                 | -29.39                                 | -31.21                              | -31.87                              |
|        | Septet     | 4.5444                                 | 5.5673                                 | 22.59                               | 4.55                                |
| Co     | Doublet    | -76.17                                 | -75.2                                  | -29.21                              | -76.18                              |
|        | Quartet    | -86.86                                 | -86.55                                 | -9.491                              | -86.85                              |
|        | Sextet     | -49.49                                 | -48.58                                 | 15                                  | -49.48                              |
|        | Octet      | 7.8232                                 | 7.4611                                 | 25.72                               | 7.462                               |
| Ni     | Singlet    | -40.81                                 | -40.27                                 | -25.41                              | -37.54                              |
|        | Triplet    | -45.06                                 | -44.69                                 | -45.06                              | -45.06                              |
|        | Quintet    | -1.154                                 | -0.004                                 | 13.99                               | 5.233                               |
|        | Septet     | 56.182                                 | 56.15                                  | 57.04                               | 56.19                               |
| Cu     | Doublet    | -55.88                                 | -55.05                                 | -37.59                              | -55.88                              |
|        | Quartet    | 4.621                                  | 8.0359                                 | -7.814                              | 7.057                               |
|        | Sextet     | 62.588                                 | 64.884                                 | 42.55                               | 66.07                               |
|        | Octet      | 117.29                                 | 124.34                                 | 116.4                               | 126.3                               |
| Zn     | Singlet    | -10.25                                 | -8.765                                 | -2.838                              | -10.25                              |
|        | Triplet    | 18.306                                 | 18.562                                 | 40.47                               | 18.31                               |
|        | Quintet    | 75.232                                 | 75.58                                  | 91.51                               | 75.23                               |
|        | Septet     | 130.49                                 | 135.49                                 | 144.6                               | 135.2                               |

**Table 7.** Binding energy ( $E_b$ , in kcal mol<sup>-1</sup>), enthalpies of reaction ( $\Delta H$ , in kcal mol<sup>-1</sup>), the bond order (B.O). the bond length ( $d_{M-Al}$  &  $d_{M-N}$ , in Å), the NBO Charge ( $q_M, q_{Al}$  &  $q_N$ , in |e|), the dipole moment ( $\mu$ , in Debye), first hyperpolarizability ( $\beta_0$ , in au), HOMO ( $E_{HOMO}$ , in eV), LUMO ( $E_{LUMO}$ , in eV) and HOMO LUMO gap ( $E_{H-L}$ , in eV) of transition metals doped  $M@x-Al_{12}N_{12}$  ( $x = r_6$  and  $r_4$ ,  $M = Sc, Ti, Mn, Cu, Zn$ )

| Properties                           |                                 | Sc@ <sub>b66</sub><br>(dist) <sup>-</sup><br>Al <sub>12</sub> N <sub>12</sub> | Ti@ <sub>b64</sub><br>(dist) <sup>-</sup><br>Al <sub>12</sub> N <sub>12</sub> | Mn@ <sub>r6-</sub><br>Al <sub>12</sub> N <sub>12</sub> | Cu@ <sub>r6-</sub><br>Al <sub>12</sub> N <sub>12</sub> | Zn@ <sub>r6-</sub><br>Al <sub>12</sub> N <sub>12</sub> | Sc@ <sub>r4-</sub><br>Al <sub>12</sub> N <sub>12</sub> |
|--------------------------------------|---------------------------------|-------------------------------------------------------------------------------|-------------------------------------------------------------------------------|--------------------------------------------------------|--------------------------------------------------------|--------------------------------------------------------|--------------------------------------------------------|
|                                      | $E_b$ (kcal/mol <sup>-1</sup> ) |                                                                               | -81.41                                                                        | -73.27                                                 | -4.567                                                 | -44.99                                                 | -9.091                                                 |
| $\Delta H$ (kcal/mol <sup>-1</sup> ) |                                 | -81.14                                                                        | -72.97                                                                        | -4.874                                                 | -44.58                                                 | -8.92                                                  | -51.93                                                 |
| Bond Order(B.O)                      |                                 | 2.57                                                                          | 2.8                                                                           | 0.34                                                   | 1.56                                                   | 0.39                                                   | 1.89                                                   |
| Bond Length<br>(d)(Å)                | $d_{M-Al}$                      | -----                                                                         | -----                                                                         | 3.74                                                   | 2.37                                                   | 3.47                                                   | -----                                                  |
|                                      | $d_{M-N}$                       | -----                                                                         | -----                                                                         | 3.66                                                   | 2.37                                                   | 3.4                                                    | -----                                                  |
| q                                    | $q_M$                           | 1.55                                                                          | 1.04                                                                          | 0.14                                                   | 0.5                                                    | 0.13                                                   | 0.75                                                   |
|                                      | $q_{Al}$                        | 1.28                                                                          | 1.42                                                                          | 1.81                                                   | 1.7                                                    | 1.81                                                   | 1.54                                                   |
|                                      | $q_N$                           | -1.83                                                                         | -1.82                                                                         | -1.86                                                  | -1.83                                                  | -1.87                                                  | -1.89                                                  |
| $\mu$ (D)                            |                                 | 3.65                                                                          | 2.56                                                                          | 0.02                                                   | 0.20                                                   | 0.34                                                   | 4.09                                                   |
| $\beta_0$ (au)                       |                                 | 5029                                                                          | 1084                                                                          | 1691                                                   | 18516                                                  | 96                                                     | 10924                                                  |
| LUMO (eV)                            |                                 | -2.53                                                                         | -2.58                                                                         | -2.53                                                  | -2.1                                                   | -2.52                                                  | -2.28                                                  |
| HOMO (eV)                            |                                 | -4.23                                                                         | -3.9                                                                          | -5.56                                                  | -3.98                                                  | -5.87                                                  | -4.31                                                  |
| $E_{H-L}$ Gap (eV)                   |                                 | 1.71                                                                          | 1.32                                                                          | 3.02                                                   | 1.88                                                   | 3.35                                                   | 2.03                                                   |



**Figure S1.** Side view of optimized structures, HOMO and LUMO of optimized structures of transition metals doped  $M@x\text{-Al}_{12}\text{N}_{12}$  ( $x = r_6$  and  $r_4$ ,  $M = \text{Sc, Ti, Mn, Cu, Zn}$ ) (all the given bond lengths are in angstrom Å)

| Optimized Structures<br>$M@x\text{-Al}_{12}\text{N}_{12}$                                                                                                                       | HOMO<br>$M@x\text{-Al}_{12}\text{N}_{12}$                                                                                                                                       | LUMO<br>$M@x\text{-Al}_{12}\text{N}_{12}$                                                                                                                                           |
|---------------------------------------------------------------------------------------------------------------------------------------------------------------------------------|---------------------------------------------------------------------------------------------------------------------------------------------------------------------------------|-------------------------------------------------------------------------------------------------------------------------------------------------------------------------------------|
| 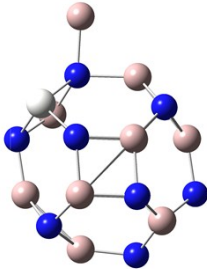 <p data-bbox="337 779 509 810"><math>\text{Sc}@r_6\text{-Al}_{12}\text{N}_{12}</math></p>     |  <p data-bbox="695 779 867 810"><math>\text{Sc}@r_6\text{-Al}_{12}\text{N}_{12}</math></p>     |  <p data-bbox="1057 779 1229 810"><math>\text{Sc}@r_6\text{-Al}_{12}\text{N}_{12}</math></p>     |
|  <p data-bbox="337 1098 509 1129"><math>\text{Ti}@r_6\text{-Al}_{12}\text{N}_{12}</math></p>  |  <p data-bbox="695 1098 867 1129"><math>\text{Ti}@r_6\text{-Al}_{12}\text{N}_{12}</math></p>  |  <p data-bbox="1057 1098 1229 1129"><math>\text{Ti}@r_6\text{-Al}_{12}\text{N}_{12}</math></p>  |
|  <p data-bbox="326 1419 526 1451"><math>\text{Mn}@r_6\text{-Al}_{12}\text{N}_{12}</math></p> |  <p data-bbox="688 1419 878 1451"><math>\text{Mn}@r_6\text{-Al}_{12}\text{N}_{12}</math></p> |  <p data-bbox="1052 1419 1242 1451"><math>\text{Mn}@r_6\text{-Al}_{12}\text{N}_{12}</math></p> |
|  <p data-bbox="331 1703 521 1734"><math>\text{Cu}@r_6\text{-Al}_{12}\text{N}_{12}</math></p> |  <p data-bbox="688 1703 878 1734"><math>\text{Cu}@r_6\text{-Al}_{12}\text{N}_{12}</math></p> |  <p data-bbox="1052 1703 1242 1734"><math>\text{Cu}@r_6\text{-Al}_{12}\text{N}_{12}</math></p> |

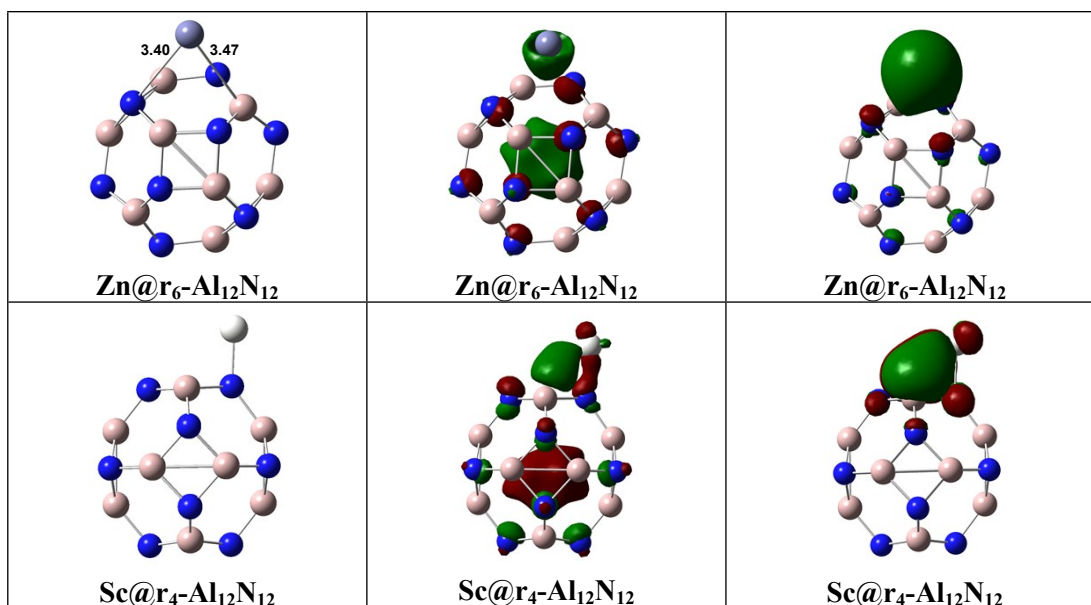

**Figure S2.** Illustration of changes in dipole moment vector with changes in the charge of transition metal

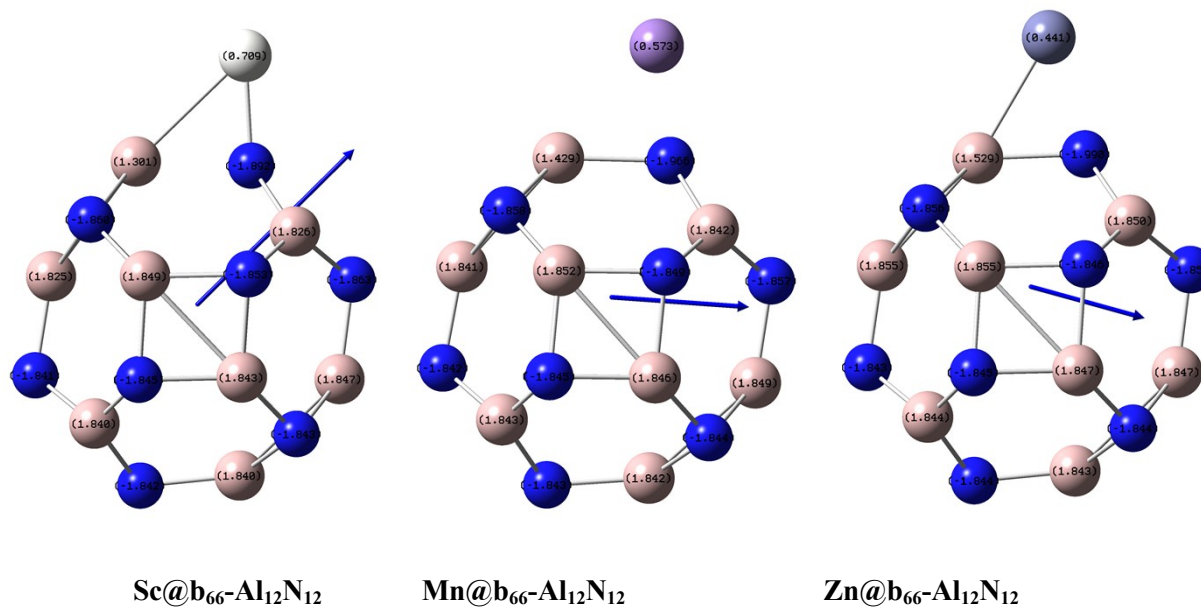

## Cartesian Coordinates

### UNDOPED Al<sub>12</sub>N<sub>12</sub>

|    |             |             |             |
|----|-------------|-------------|-------------|
| Al | 2.69554500  | 0.57149400  | -0.35069000 |
| Al | 1.36331800  | 2.21052700  | 0.98191800  |
| Al | 0.48699100  | 1.95106500  | -1.91417100 |
| Al | 1.55666900  | -0.55053100 | 2.23287600  |
| Al | 1.59231700  | -2.25892800 | -0.27893700 |
| Al | 1.05322800  | -0.99867400 | -2.36684800 |
| Al | -1.05320800 | 0.99875000  | 2.36689300  |
| Al | -1.59223600 | 2.25909900  | 0.27895500  |
| N  | -0.15582100 | -0.44214700 | 2.94721400  |
| N  | 2.46584700  | 0.79989400  | 1.47931700  |
| N  | 1.30005300  | -2.23487400 | 1.49067200  |
| N  | 1.87746200  | 2.17754800  | -0.80343700 |
| N  | 2.53239500  | -0.97696100 | -1.24187500 |
| N  | 0.15564200  | 0.44207600  | -2.94719700 |
| N  | -1.30014100 | 2.23491500  | -1.49073000 |
| N  | -0.29798500 | 2.50857700  | 1.58923800  |
| Al | -2.69577900 | -0.57145500 | 0.35069000  |
| Al | -1.36332000 | -2.21078300 | -0.98197000 |
| N  | -1.87729300 | -2.17757100 | 0.80358500  |
| N  | -2.46574300 | -0.79990100 | -1.47938100 |
| N  | -2.53201600 | 0.97703000  | 1.24179100  |
| N  | 0.29812200  | -2.50827500 | -1.58909800 |
| Al | -0.48708200 | -1.95113400 | 1.91392200  |

|    |             |            |             |
|----|-------------|------------|-------------|
| Al | -1.55672500 | 0.55040400 | -2.23269300 |
|----|-------------|------------|-------------|

**Sc@b<sub>64</sub>-Al<sub>12</sub>N<sub>12</sub>**

|    |             |             |             |
|----|-------------|-------------|-------------|
| Al | -2.36768500 | 1.75468900  | -0.13062300 |
| Al | -1.67329400 | -0.52924500 | -1.68603500 |
| N  | -2.76294200 | -0.96689600 | -0.22629500 |
| N  | -1.49640000 | 1.29076800  | -1.74259800 |
| Al | -0.50786500 | 0.98590700  | 2.35167200  |
| Al | 0.51708500  | 2.67614300  | 0.85972900  |
| N  | -1.24097900 | 2.24122400  | 1.21750700  |
| N  | 1.21530300  | 1.69933500  | 2.27701300  |
| Al | 2.89375900  | -1.28202100 | 0.11100100  |
| Al | 2.47197000  | 0.53169800  | 1.77491000  |
| N  | 2.32133300  | -1.31635800 | 1.88056500  |
| N  | 3.36654000  | 0.51468300  | 0.14311900  |
| Al | 0.36884400  | -2.66506100 | -0.85131700 |
| Al | 1.28711500  | -0.95658300 | -2.42081900 |
| N  | 2.10846100  | -2.14744900 | -1.25196700 |
| N  | -0.40361100 | -1.68481500 | -2.22185800 |
| Al | 0.20813900  | 1.82248500  | -1.98657000 |
| Al | 2.51503900  | 1.49049000  | -1.10311800 |
| N  | 1.23473400  | 2.79619400  | -0.78117100 |
| N  | 1.63518900  | 0.79080100  | -2.58298900 |
| Al | -1.69428100 | -1.63900400 | 1.08336600  |
| Al | 0.61514100  | -1.83800100 | 2.02741900  |

|    |             |             |             |
|----|-------------|-------------|-------------|
| N  | -0.85203700 | -0.77760700 | 2.48397800  |
| N  | -0.32930500 | -2.85377200 | 0.79190900  |
| Sc | -4.46740700 | -0.07962800 | -0.01407100 |

**Ti@b<sub>64</sub>-Al<sub>12</sub>N<sub>12</sub>**

|    |             |             |             |
|----|-------------|-------------|-------------|
| Al | -2.36366800 | 1.74917600  | -0.14094500 |
| Al | -1.67707600 | -0.57651100 | -1.66506800 |
| N  | -2.75999500 | -1.04716100 | -0.21018500 |
| N  | -1.50057900 | 1.24529000  | -1.74245900 |
| Al | -0.50511300 | 1.02600500  | 2.32787600  |
| Al | 0.51665800  | 2.70177000  | 0.81651400  |
| N  | -1.24092000 | 2.27944200  | 1.18966000  |
| N  | 1.21729000  | 1.74159800  | 2.24305900  |
| Al | 2.90975200  | -1.26527100 | 0.12520900  |
| Al | 2.48044400  | 0.57468500  | 1.75761300  |
| N  | 2.34028500  | -1.27074000 | 1.89645200  |
| N  | 3.37317500  | 0.53446000  | 0.12530100  |
| Al | 0.39144000  | -2.68331900 | -0.80472900 |
| Al | 1.29127600  | -0.99226900 | -2.40373300 |
| N  | 2.12582500  | -2.15884900 | -1.22007500 |
| N  | -0.39358300 | -1.72554500 | -2.18406200 |
| Al | 0.19922500  | 1.78449900  | -2.01083300 |
| Al | 2.51213700  | 1.48399900  | -1.13447900 |
| N  | 1.22592200  | 2.78843000  | -0.83027900 |
| N  | 1.62946800  | 0.75362100  | -2.59777200 |

|    |             |             |             |
|----|-------------|-------------|-------------|
| Al | -1.67968500 | -1.66093900 | 1.11689600  |
| Al | 0.63735000  | -1.79858700 | 2.05220900  |
| N  | -0.84072800 | -0.73867500 | 2.48042000  |
| N  | -0.29616800 | -2.85673700 | 0.84533400  |
| Ti | -4.33752400 | -0.05809000 | -0.02012100 |

**V@b<sub>64</sub>-Al<sub>12</sub>N<sub>12</sub>**

|    |             |             |             |
|----|-------------|-------------|-------------|
| Al | -2.38478400 | 1.69327800  | -0.15598900 |
| Al | -1.60526300 | -0.54844200 | -1.71205900 |
| N  | -2.71584300 | -1.08091600 | -0.30251400 |
| N  | -1.47939000 | 1.27875800  | -1.75140300 |
| Al | -0.57529000 | 0.90442700  | 2.33825400  |
| Al | 0.43889500  | 2.66705400  | 0.92164100  |
| N  | -1.31663800 | 2.18572200  | 1.23244500  |
| N  | 1.12862900  | 1.66667300  | 2.32484000  |
| Al | 2.94826100  | -1.21031700 | 0.13259000  |
| Al | 2.43281700  | 0.55157400  | 1.82525300  |
| N  | 2.33883500  | -1.30072300 | 1.88831400  |
| N  | 3.36422700  | 0.59954100  | 0.21534200  |
| Al | 0.48660100  | -2.64855100 | -0.90787700 |
| Al | 1.37732300  | -0.87262600 | -2.41830100 |
| N  | 2.21562100  | -2.06702700 | -1.26490200 |
| N  | -0.29451500 | -1.65149200 | -2.26122400 |
| Al | 0.21425200  | 1.86514300  | -1.95095600 |
| Al | 2.51020700  | 1.57918900  | -1.02586300 |

|    |             |             |             |
|----|-------------|-------------|-------------|
| N  | 1.18572600  | 2.84059800  | -0.70177300 |
| N  | 1.68049300  | 0.88696800  | -2.53797100 |
| Al | -1.65017500 | -1.75380600 | 0.99889300  |
| Al | 0.64660500  | -1.87661900 | 1.98585500  |
| N  | -0.86647100 | -0.87269600 | 2.42338700  |
| N  | -0.23263900 | -2.90777500 | 0.71609900  |
| V  | -4.25952600 | -0.06945000 | -0.01187900 |

**Cr@b<sub>64</sub>-Al<sub>12</sub>N<sub>12</sub>**

|    |             |             |             |
|----|-------------|-------------|-------------|
| Al | -2.29352300 | 1.43449000  | 0.06915400  |
| Al | -1.59981100 | -0.32397500 | -1.80427700 |
| N  | -2.57604500 | -0.69228200 | -0.23759000 |
| N  | -1.49602500 | 1.49306700  | -1.64255500 |
| Al | -0.45168200 | 0.62935700  | 2.51496300  |
| Al | 0.47207700  | 2.50730600  | 1.18251200  |
| N  | -1.25379800 | 1.92212700  | 1.47950500  |
| N  | 1.23438200  | 1.41973300  | 2.48719500  |
| Al | 2.95243700  | -1.22524700 | -0.05835400 |
| Al | 2.51054100  | 0.35033000  | 1.83057000  |
| N  | 2.40100000  | -1.50270800 | 1.69516900  |
| N  | 3.38519900  | 0.56131000  | 0.20186200  |
| Al | 0.44697000  | -2.51501100 | -1.19041100 |
| Al | 1.33703800  | -0.61529500 | -2.54383100 |
| N  | 2.17523200  | -1.92187800 | -1.51957300 |
| N  | -0.33916000 | -1.41700600 | -2.45904400 |
| Al | 0.19596000  | 2.08303300  | -1.76695100 |

|    |             |             |             |
|----|-------------|-------------|-------------|
| Al | 2.50248900  | 1.66466000  | -0.90834800 |
| N  | 1.19050800  | 2.88267000  | -0.41845400 |
| N  | 1.64266600  | 1.14692100  | -2.47320800 |
| Al | -1.59360000 | -1.71124700 | 0.91345900  |
| Al | 0.71039500  | -2.08457500 | 1.79783200  |
| N  | -0.75519100 | -1.14360300 | 2.45686100  |
| N  | -0.25157800 | -2.88444500 | 0.41903300  |
| Cr | -4.37337800 | -0.06529500 | -0.01652400 |

**Mn@b<sub>64</sub>-Al<sub>12</sub>N<sub>12</sub>**

|    |             |             |             |
|----|-------------|-------------|-------------|
| Al | -2.24925100 | 1.34588100  | 0.01856300  |
| Al | -1.55640700 | -0.43275800 | -1.78402800 |
| N  | -2.54515900 | -0.70180300 | -0.19565700 |
| N  | -1.50030600 | 1.39442700  | -1.70095400 |
| Al | -0.43269300 | 0.69723400  | 2.50634700  |
| Al | 0.44532600  | 2.54631200  | 1.09891400  |
| N  | -1.26864300 | 1.93117800  | 1.42269000  |
| N  | 1.23235600  | 1.52293700  | 2.43964400  |
| Al | 2.99767400  | -1.17893400 | -0.01700400 |
| Al | 2.52522200  | 0.45151900  | 1.81719600  |
| N  | 2.44963100  | -1.40636900 | 1.74461700  |
| N  | 3.39281800  | 0.62443600  | 0.18118200  |
| Al | 0.52120800  | -2.55545100 | -1.10574100 |
| Al | 1.37376800  | -0.68764700 | -2.52737200 |
| N  | 2.23599600  | -1.93835500 | -1.45501900 |



|    |             |             |             |
|----|-------------|-------------|-------------|
| N  | -0.28564800 | -1.52292600 | -2.41722000 |
| Al | 0.17858400  | 2.02048500  | -1.84664100 |
| Al | 2.48863800  | 1.66960300  | -0.96612500 |
| N  | 1.15045400  | 2.87659800  | -0.51737200 |
| N  | 1.64104600  | 1.08308300  | -2.51367900 |
| Al | -1.52443500 | -1.68583100 | 0.95933400  |
| Al | 0.77235400  | -2.02264400 | 1.87277300  |
| N  | -0.70684000 | -1.07983000 | 2.49904900  |
| N  | -0.17714400 | -2.87341200 | 0.51459300  |
| Mn | -4.45399100 | -0.06202900 | -0.01415600 |

**Fe@b<sub>64</sub>-Al<sub>12</sub>N<sub>12</sub>**

|    |             |             |             |
|----|-------------|-------------|-------------|
| Al | -2.26904400 | 1.32571100  | 0.03848500  |
| Al | -1.56001900 | -0.44438200 | -1.78819100 |
| N  | -2.52416600 | -0.77658800 | -0.20224500 |
| N  | -1.52071000 | 1.38202500  | -1.67765900 |
| Al | -0.43757700 | 0.66048000  | 2.51023100  |
| Al | 0.41546000  | 2.53829400  | 1.12447600  |
| N  | -1.29101900 | 1.90097900  | 1.44605100  |
| N  | 1.21694400  | 1.50797400  | 2.44974800  |
| Al | 3.01895200  | -1.14137500 | -0.03579100 |
| Al | 2.52630200  | 0.46411800  | 1.81519900  |
| N  | 2.48049100  | -1.39374500 | 1.72547100  |
| N  | 3.38827800  | 0.66579500  | 0.17936100  |
| Al | 0.55716000  | -2.54368400 | -1.12952500 |

|    |             |             |             |
|----|-------------|-------------|-------------|
| Al | 1.37809000  | -0.64887000 | -2.53418700 |
| N  | 2.26178200  | -1.89776900 | -1.47785100 |
| N  | -0.26868700 | -1.50721400 | -2.42645600 |
| Al | 0.14830200  | 2.03353600  | -1.82405400 |
| Al | 2.46539900  | 1.70881300  | -0.95462200 |
| N  | 1.11156300  | 2.89237900  | -0.49072100 |
| N  | 1.62133500  | 1.12490000  | -2.50509500 |
| Al | -1.49607300 | -1.74042000 | 0.95392000  |
| Al | 0.81255600  | -2.03443800 | 1.85091800  |
| N  | -0.68033900 | -1.12091900 | 2.48769400  |
| N  | -0.12672000 | -2.89362100 | 0.49098300  |
| Fe | -4.30595600 | -0.05771400 | -0.01323500 |

**Co@b<sub>64</sub>-Al<sub>12</sub>N<sub>12</sub>**

|    |             |             |             |
|----|-------------|-------------|-------------|
| Al | -2.25763900 | 1.29028100  | 0.01176200  |
| Al | -1.51844200 | -0.44591700 | -1.81614600 |
| N  | -2.49461100 | -0.78389000 | -0.24311500 |
| N  | -1.50001900 | 1.38126400  | -1.69972800 |
| Al | -0.46182400 | 0.64014400  | 2.50256500  |
| Al | 0.39518700  | 2.53176700  | 1.13826900  |
| N  | -1.30964900 | 1.88043100  | 1.43395100  |
| N  | 1.18771900  | 1.49972700  | 2.46872600  |
| Al | 3.03635000  | -1.12407800 | -0.00961300 |
| Al | 2.51102500  | 0.46755500  | 1.84435300  |
| N  | 2.47681600  | -1.38994800 | 1.74278000  |

|    |             |             |             |
|----|-------------|-------------|-------------|
| N  | 3.39097400  | 0.68386600  | 0.21969900  |
| Al | 0.60023600  | -2.53745500 | -1.14340300 |
| Al | 1.42577400  | -0.62832600 | -2.52619100 |
| N  | 2.30427800  | -1.87761400 | -1.46611400 |
| N  | -0.21598500 | -1.49968700 | -2.44573500 |
| Al | 0.16679300  | 2.04388200  | -1.81746300 |
| Al | 2.47528500  | 1.72724900  | -0.91990100 |
| N  | 1.10875200  | 2.89948600  | -0.46637700 |
| N  | 1.65444300  | 1.14698600  | -2.48393400 |
| Al | -1.48634400 | -1.75732800 | 0.91724400  |
| Al | 0.81188700  | -2.04300600 | 1.84343200  |
| N  | -0.69467200 | -1.14305000 | 2.46697000  |
| N  | -0.10335700 | -2.89920700 | 0.46586200  |
| Co | -4.24853900 | -0.05298300 | -0.01017400 |

### **Ni@b<sub>64</sub>-Al<sub>12</sub>N<sub>12</sub>**

|    |             |             |             |
|----|-------------|-------------|-------------|
| Al | -2.26294300 | 1.23894400  | -0.00083300 |
| Al | -1.49680500 | -0.50018800 | -1.80825400 |
| N  | -2.46743700 | -0.82724400 | -0.23382200 |
| N  | -1.51250000 | 1.32904400  | -1.71634600 |
| Al | -0.45969800 | 0.65421200  | 2.49848400  |
| Al | 0.36395000  | 2.54161800  | 1.10923400  |
| N  | -1.32882200 | 1.86537600  | 1.41456500  |
| N  | 1.17547500  | 1.54004600  | 2.45221400  |
| Al | 3.06386700  | -1.08358700 | 0.00299600  |

|    |             |             |             |
|----|-------------|-------------|-------------|
| Al | 2.51334700  | 0.52111900  | 1.83795000  |
| N  | 2.50752100  | -1.33770800 | 1.75814500  |
| N  | 3.38949100  | 0.73247800  | 0.21076000  |
| Al | 0.65127700  | -2.54747700 | -1.11414100 |
| Al | 1.44699600  | -0.64310600 | -2.52023600 |
| N  | 2.34513700  | -1.86564600 | -1.44504600 |
| N  | -0.18001600 | -1.54018800 | -2.43041400 |
| Al | 0.14275800  | 2.01679500  | -1.84253300 |
| Al | 2.45590100  | 1.74707200  | -0.94023300 |
| N  | 1.07076800  | 2.90193700  | -0.50016400 |
| N  | 1.64557400  | 1.13624000  | -2.49787300 |
| Al | -1.45004200 | -1.77046900 | 0.93866000  |
| Al | 0.85246300  | -2.01467900 | 1.86794200  |
| N  | -0.66689600 | -1.13241600 | 2.48451800  |
| N  | -0.05008500 | -2.89686900 | 0.49860800  |
| Ni | -4.18469300 | -0.05066500 | -0.01226700 |

### **Cu@b<sub>64</sub>-Al<sub>12</sub>N<sub>12</sub>**

|    |             |             |             |
|----|-------------|-------------|-------------|
| Al | -2.25206500 | 1.25343500  | -0.00928700 |
| Al | -1.49071900 | -0.49365800 | -1.82249500 |
| N  | -2.45434600 | -0.84819800 | -0.25915800 |
| N  | -1.49773900 | 1.33714600  | -1.71905600 |
| Al | -0.46372000 | 0.64391400  | 2.49583100  |
| Al | 0.36878200  | 2.53812400  | 1.11965100  |
| N  | -1.32711000 | 1.86445800  | 1.41653700  |

|    |             |             |             |
|----|-------------|-------------|-------------|
| N  | 1.17216900  | 1.52916800  | 2.46101500  |
| Al | 3.06892100  | -1.08474200 | 0.00885400  |
| Al | 2.51298300  | 0.51265100  | 1.84837900  |
| N  | 2.50699000  | -1.34535700 | 1.76131500  |
| N  | 3.39509100  | 0.73042200  | 0.22531300  |
| Al | 0.65897500  | -2.54240200 | -1.12396100 |
| Al | 1.46219800  | -0.63268100 | -2.51837800 |
| N  | 2.35510400  | -1.86017600 | -1.44494200 |
| N  | -0.16557700 | -1.52766300 | -2.43933800 |
| Al | 0.15856900  | 2.02328600  | -1.83587100 |
| Al | 2.46758700  | 1.75024900  | -0.92568200 |
| N  | 1.08066300  | 2.90358300  | -0.48605000 |
| N  | 1.66342300  | 1.14647000  | -2.48920200 |
| Al | -1.44855500 | -1.78032600 | 0.92523400  |
| Al | 0.85149600  | -2.02272300 | 1.86042100  |
| N  | -0.67084700 | -1.14215300 | 2.47366900  |
| N  | -0.04460300 | -2.90209700 | 0.48591800  |
| Cu | -4.09380700 | -0.04641000 | -0.00679900 |

**Zn@b<sub>64</sub>-Al<sub>12</sub>N<sub>12</sub>**

|    |             |             |             |
|----|-------------|-------------|-------------|
| Al | -2.18195900 | 1.12964100  | -0.02853400 |
| Al | -1.44665700 | -0.64290500 | -1.75705100 |
| N  | -2.39152900 | -0.85290700 | -0.14748800 |
| N  | -1.50865000 | 1.19464500  | -1.76452400 |
| Al | -0.38887400 | 0.74720400  | 2.49092100  |

|    |             |             |             |
|----|-------------|-------------|-------------|
| Al | 0.36341800  | 2.58544600  | 0.99145600  |
| N  | -1.30869600 | 1.87832500  | 1.35714800  |
| N  | 1.21712500  | 1.67516500  | 2.37113800  |
| Al | 3.13981700  | -1.02128100 | 0.02504500  |
| Al | 2.56966100  | 0.65524700  | 1.78772900  |
| N  | 2.60746000  | -1.20406100 | 1.79686100  |
| N  | 3.42236100  | 0.81092700  | 0.14296600  |
| Al | 0.75073800  | -2.58988000 | -0.99476800 |
| Al | 1.48786700  | -0.74326200 | -2.50620300 |
| N  | 2.42487900  | -1.88545400 | -1.37717600 |
| N  | -0.11470300 | -1.67633800 | -2.35905600 |
| Al | 0.12637700  | 1.92000900  | -1.94192500 |
| Al | 2.44998000  | 1.74217400  | -1.04398000 |
| N  | 1.03985900  | 2.88237200  | -0.64320800 |
| N  | 1.64235800  | 1.04153100  | -2.56504000 |
| Al | -1.33817900 | -1.74173800 | 1.03580800  |
| Al | 0.97209800  | -1.91994400 | 1.96056400  |
| N  | -0.55597600 | -1.04022000 | 2.55709100  |
| N  | 0.07306200  | -2.87613400 | 0.64071200  |
| Zn | -4.34628500 | -0.04013900 | -0.01045900 |

**Sc@b<sub>66</sub>-Al<sub>12</sub>N<sub>12</sub>**

|    |             |             |            |
|----|-------------|-------------|------------|
| Al | -0.34819800 | -1.01144900 | 2.45578700 |
| Al | 1.16468800  | 0.99041500  | 2.47920100 |
| N  | 1.49906200  | -0.82093200 | 2.64711000 |

|    |             |             |             |
|----|-------------|-------------|-------------|
| N  | -0.68133300 | 0.81403100  | 2.64699000  |
| Al | -0.07395700 | -2.67573500 | -0.00007100 |
| Al | -2.34815400 | -1.50383300 | 0.00035700  |
| N  | -1.19341900 | -2.13745800 | 1.36318500  |
| N  | -1.19388100 | -2.13735900 | -1.36288700 |
| Al | 1.16368400  | 0.99077000  | -2.47931500 |
| Al | -0.34916800 | -1.01112100 | -2.45564100 |
| N  | 1.49801400  | -0.82055300 | -2.64771400 |
| N  | -0.68241100 | 0.81436500  | -2.64627400 |
| Al | 2.90802800  | 1.23375900  | -0.00041400 |
| Al | 0.91510000  | 2.72680500  | 0.00006000  |
| N  | 2.00813400  | 2.12196200  | -1.36772800 |
| N  | 2.00862100  | 2.12174100  | 1.36736200  |
| Al | -1.57000300 | 1.51121800  | 1.26911300  |
| Al | -1.57077700 | 1.51145500  | -1.26813800 |
| N  | -2.60539000 | 0.54942600  | 0.00080400  |
| N  | -0.88312100 | 2.66658900  | 0.00041400  |
| Al | 2.40587200  | -1.48505400 | 1.24747000  |
| Al | 2.40531900  | -1.48486500 | -1.24848100 |
| N  | 1.72357900  | -2.67151100 | -0.00044200 |
| N  | 3.37169000  | -0.49541700 | -0.00064300 |
| Sc | -4.53421200 | 0.12690800  | -0.00001300 |

**Ti@b<sub>66</sub>-Al<sub>12</sub>N<sub>12</sub>**

|    |             |             |            |
|----|-------------|-------------|------------|
| Al | -0.33566900 | -1.00846200 | 2.46018400 |
|----|-------------|-------------|------------|

|    |             |             |             |
|----|-------------|-------------|-------------|
| Al | 1.18864400  | 0.98411200  | 2.48005500  |
| N  | 1.51240900  | -0.83024000 | 2.64516400  |
| N  | -0.65794600 | 0.81917500  | 2.65389700  |
| Al | -0.07993400 | -2.68119200 | -0.00192500 |
| Al | -2.30522900 | -1.43023900 | 0.00448800  |
| N  | -1.18960700 | -2.12552100 | 1.36356900  |
| N  | -1.19566100 | -2.12231700 | -1.36109600 |
| Al | 1.17692500  | 0.99003900  | -2.48107800 |
| Al | -0.34701400 | -1.00274000 | -2.45926200 |
| N  | 1.50016400  | -0.82395100 | -2.65242700 |
| N  | -0.67043800 | 0.82521100  | -2.64611000 |
| Al | 2.92678600  | 1.21702500  | -0.00445000 |
| Al | 0.94481800  | 2.72512600  | 0.00173800  |
| N  | 2.03100500  | 2.11333200  | -1.36894000 |
| N  | 2.03703300  | 2.11000600  | 1.36618100  |
| Al | -1.54296000 | 1.51687900  | 1.27288700  |
| Al | -1.55034900 | 1.51923200  | -1.25981200 |
| N  | -2.57021800 | 0.54899500  | 0.00947000  |
| N  | -0.85372100 | 2.67332900  | 0.00582700  |
| Al | 2.40960100  | -1.50025000 | 1.24176600  |
| Al | 2.40351700  | -1.49721400 | -1.25457200 |
| N  | 1.71782800  | -2.68209100 | -0.00613600 |
| N  | 3.37831800  | -0.51548700 | -0.00755900 |
| Ti | -4.49240700 | 0.10212700  | -0.00059700 |



**V@b<sub>66</sub>-Al<sub>12</sub>N<sub>12</sub>**

|    |             |             |             |
|----|-------------|-------------|-------------|
| Al | -0.34758000 | -0.99140500 | 2.45787200  |
| Al | 1.21576700  | 0.96963000  | 2.47924400  |
| N  | 1.50300800  | -0.85039900 | 2.64751900  |
| N  | -0.63405800 | 0.84211300  | 2.64857500  |
| Al | -0.12173600 | -2.66991200 | -0.00121200 |
| Al | -2.32482500 | -1.38093100 | 0.00016000  |
| N  | -1.22270200 | -2.09139800 | 1.36185900  |
| N  | -1.22351500 | -2.08992900 | -1.36297000 |
| Al | 1.21382600  | 0.97248000  | -2.47866000 |
| Al | -0.34935600 | -0.98871900 | -2.45847400 |
| N  | 1.50110200  | -0.84734100 | -2.64935500 |
| N  | -0.63610300 | 0.84501000  | -2.64670100 |
| Al | 2.96436200  | 1.16507700  | -0.00029600 |
| Al | 1.01453100  | 2.71413200  | 0.00127200  |
| N  | 2.09010600  | 2.07902500  | -1.36715000 |
| N  | 2.09105400  | 2.07743800  | 1.36824500  |
| Al | -1.50324300 | 1.55808400  | 1.26639200  |
| Al | -1.50454100 | 1.55944200  | -1.26321700 |
| N  | -2.55836000 | 0.62138600  | 0.00176800  |
| N  | -0.78406300 | 2.69770700  | 0.00186700  |
| Al | 2.38870600  | -1.53937900 | 1.24631600  |
| Al | 2.38769500  | -1.53791000 | -1.24950000 |
| N  | 1.67579800  | -2.70779800 | -0.00199700 |
| N  | 3.38109500  | -0.57609000 | -0.00143900 |

|   |             |            |             |
|---|-------------|------------|-------------|
| V | -4.42262600 | 0.09583800 | -0.00000800 |
|---|-------------|------------|-------------|

**Cr@b<sub>66</sub>-Al<sub>12</sub>N<sub>12</sub>**

|    |             |             |             |
|----|-------------|-------------|-------------|
| Al | -0.33170100 | -0.98946200 | 2.46050900  |
| Al | 1.22852800  | 0.97405300  | 2.47807000  |
| N  | 1.51885200  | -0.84571100 | 2.64829200  |
| N  | -0.62042100 | 0.84391000  | 2.64990000  |
| Al | -0.10477100 | -2.66936100 | 0.00229000  |
| Al | -2.30514100 | -1.37892100 | 0.00270200  |
| N  | -1.20610900 | -2.09101700 | 1.36490500  |
| N  | -1.20775500 | -2.09294200 | -1.35982200 |
| Al | 1.22469600  | 0.97089100  | -2.48045000 |
| Al | -0.33519000 | -0.99279900 | -2.45820800 |
| N  | 1.51506100  | -0.84912200 | -2.64886400 |
| N  | -0.62445500 | 0.84026600  | -2.64932500 |
| Al | 2.97582900  | 1.16815700  | -0.00256300 |
| Al | 1.02411600  | 2.71481800  | -0.00227400 |
| N  | 2.10051000  | 2.07930800  | -1.37037400 |
| N  | 2.10244400  | 2.08116800  | 1.36526700  |
| Al | -1.49217000 | 1.55434100  | 1.26607200  |
| Al | -1.49441100 | 1.55242800  | -1.26518000 |
| N  | -2.53908200 | 0.61651500  | 0.00230700  |
| N  | -0.77399300 | 2.69315600  | -0.00100500 |
| Al | 2.40473000  | -1.53502400 | 1.24750300  |
| Al | 2.40277700  | -1.53658600 | -1.24835300 |

|    |             |             |             |
|----|-------------|-------------|-------------|
| N  | 1.69263800  | -2.70580500 | 0.00086900  |
| N  | 3.39555000  | -0.57232000 | -0.00180700 |
| Cr | -4.37656200 | 0.09146800  | -0.00016400 |

**Mn@b<sub>66</sub>-Al<sub>12</sub>N<sub>12</sub>**

|    |             |             |             |
|----|-------------|-------------|-------------|
| Al | -0.31326300 | -0.98512100 | 2.46784700  |
| Al | 1.26218900  | 0.96414000  | 2.48307700  |
| N  | 1.53641300  | -0.86002700 | 2.64910200  |
| N  | -0.58859700 | 0.84857900  | 2.65654900  |
| Al | -0.10825300 | -2.67123500 | -0.00215000 |
| Al | -2.24900400 | -1.30855200 | 0.00061300  |
| N  | -1.20099700 | -2.06833500 | 1.36172600  |
| N  | -1.20283900 | -2.06580500 | -1.36332700 |
| Al | 1.25804100  | 0.96933400  | -2.48232800 |
| Al | -0.31707200 | -0.98020400 | -2.46864300 |
| N  | 1.53225400  | -0.85444800 | -2.65257400 |
| N  | -0.59303400 | 0.85385700  | -2.65309800 |
| Al | 3.00592800  | 1.14591900  | -0.00088400 |
| Al | 1.06977200  | 2.71529000  | 0.00234200  |
| N  | 2.13871200  | 2.06703900  | -1.36656700 |
| N  | 2.14092500  | 2.06425700  | 1.36813400  |
| Al | -1.44437600 | 1.55587300  | 1.26167400  |
| Al | -1.44657400 | 1.55838000  | -1.25542100 |
| N  | -2.51643700 | 0.62813000  | 0.00330300  |
| N  | -0.72939700 | 2.70472600  | 0.00363900  |

|    |             |             |             |
|----|-------------|-------------|-------------|
| Al | 2.41261400  | -1.55513900 | 1.24512100  |
| Al | 2.41054700  | -1.55253900 | -1.25138100 |
| N  | 1.68747800  | -2.71736800 | -0.00375900 |
| N  | 3.40899300  | -0.59900600 | -0.00296000 |
| Mn | -4.45285900 | 0.07435700  | 0.00002200  |

**Fe@b<sub>66</sub>-Al<sub>12</sub>N<sub>12</sub>**

|    |             |             |             |
|----|-------------|-------------|-------------|
| Al | -0.33617100 | 0.93645500  | -2.47464200 |
| Al | 1.28884700  | -0.97281600 | -2.46857500 |
| N  | 1.51632000  | 0.85473900  | -2.65817500 |
| N  | -0.56395400 | -0.90652100 | -2.64127700 |
| Al | -0.16980900 | 2.66074300  | -0.03027800 |
| Al | -2.28312500 | 1.25659300  | -0.01561500 |
| N  | -1.24802900 | 2.01570500  | -1.38630000 |
| N  | -1.25001700 | 2.04742800  | 1.33845900  |
| Al | 1.28341500  | -0.91785500 | 2.49098700  |
| Al | -0.34076000 | 0.99177500  | 2.45222900  |
| N  | 1.51127700  | 0.91338600  | 2.64029300  |
| N  | -0.56976900 | -0.84722900 | 2.65895500  |
| Al | 3.03760500  | -1.08200000 | 0.01451100  |
| Al | 1.14363200  | -2.70278900 | 0.03049300  |
| N  | 2.19338700  | -2.00796400 | 1.39156700  |
| N  | 2.19632700  | -2.03882400 | -1.34332800 |
| Al | -1.40186600 | -1.62938200 | -1.24456100 |
| Al | -1.40459600 | -1.60124500 | 1.27677400  |

|    |             |             |             |
|----|-------------|-------------|-------------|
| N  | -2.48892800 | -0.71529600 | 0.00476500  |
| N  | -0.65565500 | -2.73957700 | 0.02951000  |
| Al | 2.37582500  | 1.58866900  | -1.26387400 |
| Al | 2.37357200  | 1.61654600  | 1.23183300  |
| N  | 1.62458000  | 2.74917400  | -0.02954400 |
| N  | 3.39559400  | 0.67238800  | -0.00472700 |
| Fe | -4.30743600 | -0.07165000 | 0.00030700  |

**Co@b<sub>66</sub>-Al<sub>12</sub>N<sub>12</sub>**

|    |             |             |             |
|----|-------------|-------------|-------------|
| Al | -0.32947800 | 0.94832200  | -2.46954600 |
| Al | 1.30185300  | -0.95542200 | -2.47552200 |
| N  | 1.52291600  | 0.87445000  | -2.65305700 |
| N  | -0.55114000 | -0.89462200 | -2.64761000 |
| Al | -0.16721600 | 2.66335100  | -0.01320100 |
| Al | -2.26031100 | 1.23419300  | -0.00690000 |
| N  | -1.24255100 | 2.02010300  | -1.37322800 |
| N  | -1.24355100 | 2.03375300  | 1.35227300  |
| Al | 1.29937000  | -0.93145400 | 2.48533100  |
| Al | -0.33162600 | 0.97240600  | 2.45970400  |
| N  | 1.52056400  | 0.90003200  | 2.64528700  |
| N  | -0.55377900 | -0.86876000 | 2.65523700  |
| Al | 3.05288400  | -1.07392600 | 0.00639500  |
| Al | 1.16370100  | -2.70061100 | 0.01332600  |
| N  | 2.21235200  | -2.01098100 | 1.37796000  |
| N  | 2.21369700  | -2.02434800 | -1.35686800 |

|    |             |             |             |
|----|-------------|-------------|-------------|
| Al | -1.38585800 | -1.62577400 | -1.25274800 |
| Al | -1.38711000 | -1.61343000 | 1.26666400  |
| N  | -2.46136300 | -0.71915000 | 0.00193200  |
| N  | -0.63519800 | -2.74417000 | 0.01283800  |
| Al | 2.38068300  | 1.60287100  | -1.25486800 |
| Al | 2.37963800  | 1.61503500  | 1.24096800  |
| N  | 1.62701900  | 2.75414500  | -0.01286100 |
| N  | 3.40392400  | 0.68222800  | -0.00200400 |
| Co | -4.25944900 | -0.06596500 | 0.00021700  |

**Ni@b<sub>66</sub>-Al<sub>12</sub>N<sub>12</sub>**

|    |             |             |             |
|----|-------------|-------------|-------------|
| Al | -0.32686900 | 0.75095700  | -2.53220400 |
| Al | 1.32727400  | -1.12647000 | -2.39831100 |
| N  | 1.52602800  | 0.68803900  | -2.71201100 |
| N  | -0.52627500 | -1.10137700 | -2.57500600 |
| Al | -0.19308200 | 2.64744900  | -0.20998300 |
| Al | -2.25814300 | 1.18524700  | -0.09449800 |
| N  | -1.25727200 | 1.88487900  | -1.51742300 |
| N  | -1.25866700 | 2.10428800  | 1.20013100  |
| Al | 1.31895700  | -0.73574300 | 2.54672900  |
| Al | -0.33244900 | 1.14140300  | 2.38270300  |
| N  | 1.51987800  | 1.10489200  | 2.57181700  |
| N  | -0.53456400 | -0.68234200 | 2.71371300  |
| Al | 3.07778000  | -1.03705500 | 0.08539600  |
| Al | 1.20825500  | -2.68183800 | 0.21217000  |

|    |             |             |             |
|----|-------------|-------------|-------------|
| N  | 2.24774500  | -1.88074900 | 1.52220000  |
| N  | 2.25268100  | -2.09742800 | -1.20359300 |
| Al | -1.35679000 | -1.73553400 | -1.12963200 |
| Al | -1.35962400 | -1.53591600 | 1.38243700  |
| N  | -2.44036500 | -0.75665100 | 0.05569500  |
| N  | -0.58923600 | -2.74500000 | 0.21545200  |
| Al | 2.37007100  | 1.52969100  | -1.37027400 |
| Al | 2.36840000  | 1.72715700  | 1.11756600  |
| N  | 1.60004900  | 2.75977300  | -0.21698800 |
| N  | 3.40510700  | 0.71835500  | -0.05332900 |
| Ni | -4.19946000 | -0.05922400 | 0.00350400  |

**Cu@b<sub>66</sub>-Al<sub>12</sub>N<sub>12</sub>**

|    |             |             |             |
|----|-------------|-------------|-------------|
| Al | -0.32525200 | 0.87623100  | -2.48968500 |
| Al | 1.33397800  | -1.00117200 | -2.45212200 |
| N  | 1.52758400  | 0.82745400  | -2.67364400 |
| N  | -0.51927400 | -0.97269200 | -2.62580600 |
| Al | -0.19014900 | 2.65507600  | -0.07548400 |
| Al | -2.25181200 | 1.19005000  | -0.03376000 |
| N  | -1.25498700 | 1.96050500  | -1.41989700 |
| N  | -1.25561800 | 2.04011000  | 1.30604100  |
| Al | 1.33030300  | -0.86061700 | 2.50528900  |
| Al | -0.32760900 | 1.01692900  | 2.43623200  |
| N  | 1.52506100  | 0.97740400  | 2.62281600  |
| N  | -0.52293100 | -0.82167000 | 2.67605400  |

|    |             |             |             |
|----|-------------|-------------|-------------|
| Al | 3.08622700  | -1.03416200 | 0.03076800  |
| Al | 1.22118000  | -2.68851600 | 0.07623700  |
| N  | 2.26019300  | -1.95152700 | 1.42407700  |
| N  | 2.26245900  | -2.02962800 | -1.30954300 |
| Al | -1.34591300 | -1.68539900 | -1.21554500 |
| Al | -1.34725500 | -1.61338000 | 1.30697900  |
| N  | -2.41842800 | -0.77081600 | 0.02017300  |
| N  | -0.57626700 | -2.76086200 | 0.07787200  |
| Al | 2.37258100  | 1.60162300  | -1.29275600 |
| Al | 2.37211000  | 1.67298600  | 1.20176000  |
| N  | 1.60253600  | 2.77153700  | -0.07818800 |
| N  | 3.41018500  | 0.72680200  | -0.01921100 |
| Cu | -4.11560800 | -0.05730200 | 0.00075500  |

### **Zn@b<sub>66</sub>-Al<sub>12</sub>N<sub>12</sub>**

|    |             |             |             |
|----|-------------|-------------|-------------|
| Al | -0.29740000 | 1.58437400  | -2.11282500 |
| Al | 1.39924000  | -0.17917700 | -2.64050100 |
| N  | 1.55471700  | 1.63387600  | -2.28431200 |
| N  | -0.45419100 | -0.13526200 | -2.80843000 |
| Al | -0.20751200 | 2.53959200  | 0.74510200  |
| Al | -2.17953800 | 1.03473100  | 0.30236100  |
| N  | -1.25086100 | 2.25687100  | -0.75950800 |
| N  | -1.25172600 | 1.48760800  | 1.85687700  |
| Al | 1.39856700  | -1.57930500 | 2.12579300  |
| Al | -0.29830200 | 0.19039100  | 2.63245800  |



|    |             |             |             |
|----|-------------|-------------|-------------|
| N  | 1.55352100  | 0.13905200  | 2.80496500  |
| N  | -0.45519600 | -1.63240100 | 2.28867000  |
| Al | 3.15104500  | -0.93932300 | -0.27482400 |
| Al | 1.32047700  | -2.56658900 | -0.75319400 |
| N  | 2.34732100  | -2.25932700 | 0.76139900  |
| N  | 2.34746800  | -1.48892100 | -1.86043900 |
| Al | -1.26057700 | -1.25396000 | -1.67405100 |
| Al | -1.26105200 | -1.95907600 | 0.72903300  |
| N  | -2.36747600 | -0.77333700 | -0.22827300 |
| N  | -0.47414600 | -2.67510300 | -0.78591800 |
| Al | 2.37887800  | 1.96206300  | -0.72432800 |
| Al | 2.37831500  | 1.25886200  | 1.67078800  |
| N  | 1.58175300  | 2.68337300  | 0.78815400  |
| N  | 3.43378200  | 0.75868700  | 0.22341800  |
| Zn | -4.35808700 | -0.03898000 | -0.01039300 |

**Sc@r<sub>6</sub>-Al<sub>12</sub>N<sub>12</sub>**

|    |             |             |             |
|----|-------------|-------------|-------------|
| Al | -4.48833300 | 0.79231900  | -0.14983900 |
| Al | -1.53652000 | -0.10131300 | -1.90632700 |
| N  | -1.28090800 | -1.90353300 | -1.64661400 |
| N  | -2.68343300 | 0.23621400  | -0.46065600 |
| Al | 0.57798300  | -2.32522800 | 1.45803000  |
| Al | -0.64835300 | -0.43233700 | 2.51114900  |
| N  | -1.24274600 | -1.96914900 | 1.62637600  |
| N  | 1.11338500  | -1.02176300 | 2.65533600  |

|    |             |             |             |
|----|-------------|-------------|-------------|
| Al | 2.69266500  | 1.54641200  | -0.04319500 |
| Al | 2.30171400  | 0.13019300  | 1.97101900  |
| N  | 3.31322000  | -0.14374900 | 0.43426200  |
| N  | 1.97568400  | 1.92068700  | 1.62531000  |
| Al | 1.35178400  | 0.49500900  | -2.53439700 |
| Al | 0.13294900  | 2.38822900  | -1.43604300 |
| N  | 1.94550500  | 1.98862800  | -1.61384600 |
| N  | -0.41033300 | 1.07249300  | -2.63385600 |
| Al | -2.10130000 | 1.69904100  | 0.67293900  |
| Al | 0.21423200  | 2.27222300  | 1.54813800  |
| N  | -1.16405900 | 1.25458600  | 2.24276300  |
| N  | -0.73055900 | 2.82916600  | 0.05970800  |
| Al | 0.48510400  | -2.25107000 | -1.56383200 |
| Al | 2.64022500  | -1.45016300 | -0.59262200 |
| N  | 1.43464000  | -2.76672000 | -0.05780400 |
| N  | 1.85175600  | -1.20468400 | -2.25783800 |
| Sc | -2.37823800 | -1.80801600 | 0.04917900  |

**Ti@r<sub>6</sub>-Al<sub>12</sub>N<sub>12</sub>**

|    |             |             |             |
|----|-------------|-------------|-------------|
| Al | -0.06110600 | 1.71653900  | -2.10361600 |
| Al | -2.34520600 | 1.57575700  | -1.10462500 |
| N  | -0.94445000 | 2.77202100  | -0.85798100 |
| N  | -1.58101700 | 0.76401100  | -2.58925400 |
| Al | 4.55396000  | -0.73870700 | 0.11360700  |
| Al | 1.60621300  | -0.75692500 | -1.77326000 |

|    |             |             |             |
|----|-------------|-------------|-------------|
| N  | 1.60752400  | 1.05724700  | -1.96510600 |
| N  | 2.67395800  | -0.91496100 | -0.22321900 |
| Al | -0.65166900 | -1.76149100 | 2.12087400  |
| Al | 1.61472700  | -1.64845900 | 1.08677700  |
| N  | 0.88092000  | -0.78591100 | 2.54151300  |
| N  | 0.21564700  | -2.82926000 | 0.86653900  |
| Al | -2.33623300 | 0.73020100  | 1.80040000  |
| Al | -2.92415400 | -1.10571800 | 0.21274000  |
| N  | -2.31655800 | -1.11995900 | 1.97081900  |
| N  | -3.25433300 | 0.72194700  | 0.18609700  |
| Al | -1.36872900 | -1.00139500 | -2.38216100 |
| Al | -0.53264100 | -2.70256300 | -0.75720700 |
| N  | 0.26864400  | -1.86626100 | -2.20099900 |
| N  | -2.23619600 | -2.07328600 | -1.13441100 |
| Al | -0.21083800 | 2.67345600  | 0.77747700  |
| Al | 0.65756400  | 0.99178600  | 2.38295000  |
| N  | 1.51827800  | 2.11776800  | 1.18383900  |
| N  | -0.99379500 | 1.82880500  | 2.23763800  |
| Ti | 2.50477700  | 1.30239200  | -0.22589800 |

**Mn@r<sub>6</sub>-Al<sub>12</sub>N<sub>12</sub>**

|    |            |             |            |
|----|------------|-------------|------------|
| Al | 1.64325300 | 1.30388600  | 1.16791300 |
| Al | 0.18758800 | -0.04559600 | 2.68763200 |
| N  | 1.80193300 | -0.42351300 | 1.83940000 |
| N  | 0.23377100 | 1.76815700  | 2.28459100 |

|    |             |             |             |
|----|-------------|-------------|-------------|
| Al | 1.64317400  | 0.34076500  | -1.71331900 |
| Al | 0.20721100  | 2.34505300  | -1.30445100 |
| N  | 1.81685300  | 1.78487100  | -0.55350300 |
| N  | 0.24098100  | 1.08877700  | -2.67350700 |
| Al | -2.67239700 | -1.30388800 | -1.16723500 |
| Al | -1.21905000 | 0.04568000  | -2.68555100 |
| N  | -1.26298000 | -1.76904600 | -2.28627600 |
| N  | -2.82881100 | 0.42259300  | -1.83663800 |
| Al | -1.23882400 | -2.34336300 | 1.30381400  |
| Al | -2.67275100 | -0.34046600 | 1.71352800  |
| N  | -2.84376500 | -1.78234900 | 0.55371500  |
| N  | -1.27035100 | -1.08981400 | 2.67555600  |
| Al | -1.21774900 | 2.30805100  | 1.37800900  |
| Al | -2.66020100 | 1.67402300  | -0.56164100 |
| N  | -1.24631800 | 2.86875200  | -0.39300600 |
| N  | -2.83004900 | 1.38927800  | 1.26726200  |
| Al | 1.63048300  | -1.67405200 | 0.56205800  |
| Al | 0.18637900  | -2.30965200 | -1.37867700 |
| N  | 1.80301800  | -1.39053300 | -1.26876200 |
| N  | 0.21686100  | -2.86647800 | 0.39344700  |
| Mn | 4.94237900  | -0.00042400 | -0.00171900 |

**Cu@r<sub>6</sub>-Al<sub>12</sub>N<sub>12</sub>**

|    |            |             |            |
|----|------------|-------------|------------|
| Al | 1.74543100 | -1.01663400 | 1.55745900 |
| Al | 0.32776800 | -2.67568900 | 0.31929000 |

|    |             |             |             |
|----|-------------|-------------|-------------|
| N  | 1.94851500  | -1.84158900 | -0.14530100 |
| N  | 0.33499900  | -2.06774700 | 2.08228700  |
| Al | 1.75430000  | 1.85633800  | 0.10037900  |
| Al | 0.33242900  | 1.61343000  | 2.15581900  |
| N  | 1.95005400  | 0.78861400  | 1.66491200  |
| N  | 0.34333400  | 2.83626600  | 0.74875100  |
| Al | -2.53602600 | 0.98191200  | -1.45542900 |
| Al | -1.10898100 | 2.68286900  | -0.30445200 |
| N  | -1.11102600 | 2.02917100  | -2.04369700 |
| N  | -2.71057900 | 1.87533300  | 0.16655100  |
| Al | -1.11322800 | -1.60287200 | -2.17039600 |
| Al | -2.54146800 | -1.74775200 | -0.12209600 |
| N  | -2.71211000 | -0.78674500 | -1.70525500 |
| N  | -1.11831600 | -2.78369100 | -0.73613800 |
| Al | -1.11625700 | -1.07645800 | 2.47306400  |
| Al | -2.53989900 | 0.77341600  | 1.57340000  |
| N  | -1.11600800 | 0.75596900  | 2.77571500  |
| N  | -2.71514200 | -1.07819600 | 1.53401800  |
| Al | 1.75169200  | -0.84422400 | -1.65612600 |
| Al | 0.33511900  | 1.05994100  | -2.47483400 |
| N  | 1.95315800  | 1.04437100  | -1.51689600 |
| N  | 0.34140400  | -0.77049300 | -2.82889500 |
| Cu | 3.22415700  | -0.00222200 | 0.00271100  |

**Zn@r<sub>6</sub>-Al<sub>12</sub>N<sub>12</sub>**

|    |             |             |             |
|----|-------------|-------------|-------------|
| Al | 1.58104000  | -0.24895700 | -1.72911200 |
| Al | 0.13943200  | 1.77247600  | -2.01892600 |
| N  | 1.74971300  | 1.50070800  | -1.12623400 |
| N  | 0.17700700  | 0.12938400  | -2.88536400 |
| Al | 1.57682100  | -1.38011400 | 1.08039900  |
| Al | 0.12996900  | -2.63577100 | -0.52548000 |
| N  | 1.74360400  | -1.73324700 | -0.73586500 |
| N  | 0.16893800  | -2.56570400 | 1.33098300  |
| Al | -2.72573800 | 0.25064500  | 1.73468100  |
| Al | -1.28616800 | -1.77173000 | 2.01835500  |
| N  | -1.31997500 | -0.13101700 | 2.88966600  |
| N  | -2.89226500 | -1.49692300 | 1.12483000  |
| Al | -1.27638300 | 2.63538000  | 0.52553000  |
| Al | -2.72125800 | 1.38466700  | -1.08393300 |
| N  | -2.88605800 | 1.73067800  | 0.73399300  |
| N  | -1.31162800 | 2.57083900  | -1.33124900 |
| Al | -1.28072500 | -0.86020000 | -2.54461200 |
| Al | -2.72783300 | -1.62504700 | -0.65688900 |
| N  | -1.32023100 | -2.43593200 | -1.56124900 |
| N  | -2.88808000 | -0.22156800 | -1.86444200 |
| Al | 1.58337200  | 1.61987600  | 0.65554500  |
| Al | 0.13399400  | 0.86074700  | 2.54532100  |
| N  | 1.74583300  | 0.22176000  | 1.86874100  |
| N  | 0.17755800  | 2.43360100  | 1.55760800  |
| Zn | 4.57814300  | -0.00145700 | -0.00071300 |

**Sn@r<sub>4</sub>-Al<sub>12</sub>N<sub>12</sub>**

|    |             |             |             |
|----|-------------|-------------|-------------|
| Al | -2.11770800 | -1.04218100 | 1.20206800  |
| Al | -2.08001000 | -0.68600700 | -1.44683100 |
| N  | -1.66847100 | -2.06776700 | -0.28218000 |
| N  | -2.61669300 | 0.55383700  | 0.04372800  |
| Al | 0.77071300  | -1.49483300 | 2.28840300  |
| Al | -0.01195300 | 0.84565500  | 2.59297200  |
| N  | -0.91726000 | -0.76135600 | 2.52692300  |
| N  | 1.67867700  | 0.08051200  | 2.68696100  |
| Al | 2.77892200  | 0.92167200  | -1.12194000 |
| Al | 2.76259400  | 0.59930100  | 1.35634100  |
| N  | 3.36727300  | -0.46934200 | -0.03909100 |
| N  | 2.51977200  | 2.10540900  | 0.28982100  |
| Al | 0.80611500  | -0.85700100 | -2.58969400 |
| Al | 0.02592100  | 1.48711400  | -2.29800200 |
| N  | 1.71768100  | 0.76524900  | -2.55857500 |
| N  | -0.87982700 | -0.08157400 | -2.65612800 |
| Al | -1.53653800 | 2.00836400  | 0.24474700  |
| Al | 0.84186800  | 2.72245400  | 0.35749100  |
| N  | -0.42153900 | 2.33495800  | 1.67356800  |
| N  | -0.39960300 | 2.69167100  | -1.03383300 |
| Al | 0.00719500  | -2.69535900 | -0.35305700 |
| Al | 2.38528900  | -1.95940300 | -0.24062500 |
| N  | 1.24349600  | -2.68402100 | 1.03342700  |

|    |             |             |             |
|----|-------------|-------------|-------------|
| N  | 1.26229000  | -2.32840800 | -1.67390800 |
| Sc | -4.49627900 | 0.04660700  | 0.00146100  |
